# Supplementary material
Source: Elsevier journal article supplement (https://www.sciencedirect.com/science/article/pii/S2254887421000680)
Supplement: mmc1 [file S2254887421000680:mmc1.pdf]

## MATERIAL SUPLEMENTARIO

### Listado de verificación (*checklist*) de la VIMA

1. ¿Está el paciente institucionalizado?

2. ¿Se ha evaluado la capacidad para realizar las actividades básicas de la vida diaria?

Autónomo ..... Dependencia leve ..... moderada ..... grave ..... Total .....

3. ¿Se ha evaluado la función cognitiva?

Función cognitiva conservada o deterioro leve .....

Deterioro moderado .....

Deterioro grave .....

4. ¿Se ha descartado la existencia de delirium?

5. ¿Se ha evaluado la situación afectiva?

6. ¿Se ha evaluado la situación sociofamiliar?..... ¿Hay riesgo social? .....

7. ¿Necesita un cuidador? ¿Tiene cuidador? ¿Se ha identificado al cuidador principal? ¿Hay indicios de sobrecarga del cuidador?

8. ¿Es un anciano frágil? ..... ¿Está desnutrido? ..... ¿Hay riesgo alto de caídas? ..... ¿Hay riesgo alto de úlceras por presión? .....

9. Pronóstico. ¿Cuál es la probabilidad de muerte al año? ..... ¿Es un paciente terminal? .....

10. ¿Se ha revisado y actualizado la medicación? ..... ¿Se ha valorado la adherencia al tratamiento? ..... ¿Se han valorado las oportunidades de desprescripción? .....

11. ¿Se ha realizado, se ha propuesto o se ha actualizado, si existía previamente, un plan de cuidados individual y personalizado?

12. ¿Se ha incluido el resultado de la valoración integral y multidimensional en el informe de alta?

## Índice de Barthel

| Funciones                                                                  | Descripciones                                                                                                                                                                                                                          | Valoración              | SITUACIÓN BASAL |
|----------------------------------------------------------------------------|----------------------------------------------------------------------------------------------------------------------------------------------------------------------------------------------------------------------------------------|-------------------------|-----------------|
| ALIMENTACIÓN                                                               | Come solo en un tiempo razonable. Es capaz de poder utilizar cubiertos si lo necesita, de cortar el alimento, usar sal, extender mantequilla, etc.                                                                                     | Independiente           | 10              |
|                                                                            | Necesita ayuda para alguna de las actividades previas.                                                                                                                                                                                 | Necesita ayuda          | 5               |
|                                                                            | Necesita ser alimentado.                                                                                                                                                                                                               | Dependiente             | 0               |
| BAÑO                                                                       | Es capaz de bañarse o ducharse, incluyendo salir o entrar de la bañera y secarse.                                                                                                                                                      | Independiente           | 5               |
|                                                                            | Necesita alguna ayuda.                                                                                                                                                                                                                 | Dependiente             | 0               |
| VESTIRSE                                                                   | Es capaz de ponerse, quitarse y colgar la ropa, atarse los cordones, abrocharse botones o utilizar cremalleras (o braguero o corsé).<br>Se excluye la utilización de sujetador.                                                        | Independiente           | 10              |
|                                                                            | Necesita ayuda para al menos la mitad del trabajo de estas actividades. Debe de hacerlo en un tiempo razonable.                                                                                                                        | Necesita ayuda          | 5               |
|                                                                            |                                                                                                                                                                                                                                        | Dependiente             | 0               |
| ARREGLARSE                                                                 | Es capaz de lavarse las manos y cara, peinarse, maquillarse, limpiarse los dientes y afeitarse.                                                                                                                                        | Independiente           | 5               |
|                                                                            | Necesita alguna ayuda.                                                                                                                                                                                                                 | Dependiente             | 0               |
| DEPOSICIONES                                                               | Es capaz de controlar deposiciones.<br>Es capaz de colocarse supositorio o enema.                                                                                                                                                      | Independiente           | 10              |
|                                                                            | Tiene incontinencia ocasional o requiere ayuda para supositorio o enema.                                                                                                                                                               | Necesita ayuda          | 5               |
|                                                                            |                                                                                                                                                                                                                                        | Dependiente             | 0               |
| MICCIÓN                                                                    | Es capaz de controlar micción día y noche.<br>Es capaz de cuidar sonda y cambiar bolsa de orina                                                                                                                                        | Continente              | 10              |
|                                                                            | Tiene incontinencia ocasional o no da tiempo a llegar al baño o necesita ayuda ocasional para cuidar la sonda uretral.                                                                                                                 | Incontinencia ocasional | 5               |
|                                                                            |                                                                                                                                                                                                                                        | Incontinente            | 0               |
| USAR EL RETRETE                                                            | Es capaz de bajarse y subirse la ropa, de no mancharla, sentarse y levantarse de la taza, de usar papel higiénico. Si lo requiere puede apoyarse sobre una barra. Si requiere cuña, debe ser capaz de colocarla, vaciarla y limpiarla. | Independiente           | 10              |
|                                                                            | Necesita ayuda para guardar el equilibrio, en el manejo de la ropa o en la utilización del papel higiénico.                                                                                                                            | Necesita ayuda          | 5               |
|                                                                            |                                                                                                                                                                                                                                        | Dependiente             | 0               |
| TRASLADARSE desde la cama al sillón o a la silla de ruedas                 | Es capaz de realizar con seguridad, el traslado del sillón a la cama, tanto con andador o silla de ruedas –levantando reposapiés, cerrando la silla–, conseguir sentarse o tumbarse en la cama, y de volver de la cama al sillón.      | Independiente           | 15              |
|                                                                            | Necesita ayuda mínima para algún paso de esta actividad o ser supervisado física o verbalmente en los distintos pasos.                                                                                                                 | Mínima ayuda            | 10              |
|                                                                            | Necesita gran ayuda para levantarse de la cama o para trasladarse al sillón. Puede permanecer sentado sin ayuda.                                                                                                                       | Gran ayuda              | 5               |
|                                                                            |                                                                                                                                                                                                                                        | Dependiente             | 0               |
| DEAMBULAR                                                                  | Puede caminar 45 metros sin ayuda o supervisión, espontáneamente o con muletas (no andador).<br>Si utiliza prótesis es capaz de ponérsela y quitársela solo.                                                                           | Independiente           | 15              |
|                                                                            | Necesita ayuda o supervisión para caminar 45 metros.<br>Deambula con andador.                                                                                                                                                          | Necesita ayuda          | 10              |
|                                                                            | Puede empujar la silla 45 metros y manejarla con soltura (doblar esquinas, girar, maniobrarla por la casa, etc.).                                                                                                                      | En silla de ruedas      | 5               |
|                                                                            | Camina menos de 50 metros.<br>Si utiliza silla de ruedas debe ser empujada por otra persona.                                                                                                                                           | Dependiente             | 0               |
|                                                                            |                                                                                                                                                                                                                                        |                         |                 |
| SUBIR Y BAJAR ESCALERAS                                                    | Es capaz de subir y bajar un piso sin ayuda ni supervisión.<br>Puede usar bastones o muletas o apoyarse en la barandilla.                                                                                                              | Independiente           | 10              |
|                                                                            | Necesita ayuda física o verbal.                                                                                                                                                                                                        | Necesita ayuda          | 5               |
|                                                                            |                                                                                                                                                                                                                                        | Dependiente             | 0               |
| <b>PUNTUACIÓN TOTAL (sumando las de cada función; máximo posible: 100)</b> |                                                                                                                                                                                                                                        |                         |                 |

## Short Portable Mental Questionnaire o cuestionario de Pfeiffer

| PREGUNTAS                                                                          | ACIERTOS | ERRORES |
|------------------------------------------------------------------------------------|----------|---------|
| 1. ¿Qué día es hoy? (día del mes, mes, año)                                        |          |         |
| 2. ¿Qué día de la semana es hoy?                                                   |          |         |
| 3. ¿Dónde estamos ahora?                                                           |          |         |
| 4. ¿Cuál es su número de teléfono? o ¿cuál es su dirección? (si no tiene teléfono) |          |         |
| 5. ¿Cuántos años tiene?                                                            |          |         |
| 6. ¿Cuál es la fecha de su nacimiento? (día, mes y año)                            |          |         |
| 7. ¿Quién es ahora el presidente del Gobierno?                                     |          |         |
| 8. ¿Quién fue el anterior presidente del Gobierno?                                 |          |         |
| 9. ¿Cuáles son los 2 apellidos de su madre?                                        |          |         |
| 10. Restar de 3 en 3 al número 20 hasta llegar al 0.                               |          |         |
| Puntuación total (número de errores)                                               |          |         |

Resultados del cuestionario: 0-2 normal, 3-4 deterioro cognitivo leve, 5-7 deterioro cognitivo moderado y 8-10 deterioro cognitivo severo.

## **Confusion Assessment Method**

1. Inicio agudo y fluctuantes  
¿Hay evidencia de un cambio agudo en el estado mental del paciente?  
¿Tiende la conducta anormal a fluctuar durante el día?  
Si la respuesta es NO, no seguir el cuestionario,
2. Alteración de la atención  
¿El paciente se distrae con facilidad o tiene dificultad para seguir una conversación?  
Si la respuesta es NO, no seguir el cuestionario,
3. Pensamiento desorganizado  
¿Tiene el paciente pensamiento desorganizado o incoherente, tal como conversación vaga e irrelevante, flujo de ideas ilógicas o poco claras, cambios impredecibles desde uno a otro tema o confunde a las personas?
4. Alteración del nivel de conciencia  
¿Cómo evaluaría el nivel de conciencia del paciente? Alerta (normal), vigilante (hiperalerta), letárgico (somnoliento, pero fácilmente despertable), estupor (dificultad para despertarlo) o en coma (no despierta),

Son necesarios los criterios 1 y 2 + el 3 o 4.

### Test de Yesavage

| Preguntas                                                | Puntuación |    |
|----------------------------------------------------------|------------|----|
|                                                          | Sí         | No |
| ¿Siente que su vida está vacía?                          | 1          | 0  |
| ¿Se siente con frecuencia aburrido/a?                    | 1          | 0  |
| ¿Se encuentra de buen humor la mayor parte del tiempo?   | 0          | 1  |
| ¿Con frecuencia se siente desamparado/a, desprotegido/a? | 1          | 0  |
| Total                                                    |            |    |

Un resultado de dos o más puntos indica que el cuestionario de cribado es positivo y es preciso realizar un diagnóstico de depresión.

## Escala sociofamiliar de Gijón

| DIMENSIONES                                                        | Descripciones                                                                                       | PUNTUACIÓN |
|--------------------------------------------------------------------|-----------------------------------------------------------------------------------------------------|------------|
| A- SITUACIÓN FAMILIAR                                              | Vive con familia sin dependencia físico-psíquica                                                    | 1          |
|                                                                    | Vive con cónyuge de similar edad                                                                    | 2          |
|                                                                    | Vive con familia y/o cónyuge y presenta algún grado de dependencia                                  | 3          |
|                                                                    | Vive solo y tiene hijos próximos                                                                    | 4          |
|                                                                    | Vive solo y carece de hijos o viven alejados                                                        | 5          |
| B- SITUACIÓN ECONÓMICA                                             | Más de 1'5 veces el salario mínimo                                                                  | 1          |
|                                                                    | Desde 1'5 veces el salario mínimo hasta el salario mínimo inclusive                                 | 2          |
|                                                                    | Desde el salario mínimo a pensión mínima contributiva                                               | 3          |
|                                                                    | LISMI – FAS – Pensión no contributiva                                                               | 4          |
|                                                                    | Sin ingresos o inferiores al apartado anterior                                                      | 5          |
| C- VIVIENDA                                                        | Adecuada a las necesidades                                                                          | 1          |
|                                                                    | Barreras arquitectónicas en la vivienda o portal de la casa (peldaños, puertas estrechas, baños...) | 2          |
|                                                                    | Humedades, mala higiene, equipamiento inadecuado (sin baño completo, agua caliente, calefacción...) | 3          |
|                                                                    | Ausencia de ascensor, teléfono                                                                      | 4          |
|                                                                    | Vivienda inadecuada (chabolas, vivienda declarada en ruina, ausencia de equipamientos mínimos)      | 5          |
| D- RELACIONES SOCIALES                                             | Relaciones sociales                                                                                 | 1          |
|                                                                    | Relación social sólo con familia y vecinos                                                          | 2          |
|                                                                    | Relación social sólo con familia o vecinos                                                          | 3          |
|                                                                    | No sale del domicilio, recibe visitas                                                               | 4          |
|                                                                    | No sale y no recibe visitas                                                                         | 5          |
| E- APOYO DE LA RED SOCIAL                                          | Con apoyo familiar y vecinal                                                                        | 1          |
|                                                                    | Voluntariado social, ayuda domiciliaria                                                             | 2          |
|                                                                    | No tiene apoyo                                                                                      | 3          |
|                                                                    | Pendiente del ingreso en residencia geriátrica                                                      | 4          |
|                                                                    | Tiene cuidados permanentes                                                                          | 5          |
| TOTAL (sumando puntuaciones de cada dimensión; máximo posible: 25) |                                                                                                     |            |

Se considera que existe riesgo social cuando la puntuación es > 10.

### Escala FRAIL (fragilidad= 3 o más de los siguientes 5 puntos)

**1: Fatigue (Fatiga):**

¿Se siente cansado la mayor parte del tiempo?      Sí      No

**2: Resistance (Resistencia)**

¿Puede subir un piso de escaleras sin hacer pausas sin ayuda?      Sí      No

**3: Ambulance (Deambulaci3n)**

¿Es capaz de caminar 100 metros sin hacer pausas sin ayuda?      Sí      No

**4: Illness (Enfermedad) (m1s de 5 de los siguientes:)      Sí      No**

¿Padece m1s de 5 de las siguientes enfermedades?

Artritis, diabetes, angina/infarto, hipertensi3n, ictus, asma, bronquitis cr3nica, enfisema, osteoporosis, c1ncer colorrectal, c1ncer cut1neo, depresi3n/ansiedad, demencia, 1lceras en piernas.

**5: Loss of weight (p3rdida de peso)**

¿Ha tenido una p3rdida de peso >5% en 1ltimos 6 meses?      Sí      No

Cada respuesta afirmativa se considera un punto.

Un paciente es fr1gil cuando la puntuaci3n es  $\geq 3$ .

### **Mini Nutritional Assessment – Short Form**

**A** ¿Ha disminuido la ingesta de alimentos en los últimos tres meses debido a la pérdida de apetito, problemas digestivos o dificultades para masticar o tragar?

Puntuación 0 = ha comido mucho menos, 1 = ha comido menos, 2 = ha comido igual.

**B** ¿Ha perdido peso de forma involuntaria en los últimos 3 meses?

Puntuación 0 = pérdida de peso superior a 3 kg, 1 = no lo sabe, 2 = pérdida de peso entre 1 y 3 kg, 3 = sin pérdida de peso.

**C** ¿Movilidad?

Puntuación 0 = en cama o silla de ruedas, 1 = es capaz de levantarse de la cama/silla, pero no sale a la calle, 2 = sale a la calle.

**D** ¿Ha sufrido el paciente estrés psicológico o enfermedad aguda en los últimos tres meses?

Puntuación 0 = sí, 2 = no.

**E** ¿Problemas neuropsicológicos?

Puntuación 0 = demencia o depresión graves, 1 = demencia leve, 2 = sin problemas psicológicos.

**F** ¿Índice de masa corporal (IMC)?(peso en kg /estatura en m<sup>2</sup>)

Puntuación 0 = IMC < 19, 1 = IMC entre 19 y 21, 2 = IMC entre 21 y 23, 3 = IMC ≥ 23

Si no se puede calcular el IMC mida el perímetro de la pantorrilla.

Puntuación 0 = <31 cm, 1 = ≥ cm

12-14 puntos: estado nutricional normal

8-11 puntos: riesgo de desnutrición

0-7 puntos: desnutrición

### **Escala de Downton para la evaluación de riesgo de caídas**

|                        |                                          |
|------------------------|------------------------------------------|
| Caídas previas         | No (0)                                   |
|                        | Sí (1)                                   |
| Medicación             | Ninguna (0)                              |
|                        | Tranquilizantes-Sedantes (1)             |
|                        | Diuréticos (1)                           |
|                        | Hipotensores (No diuréticos) (1)         |
|                        | Antiparkinsonianos (1)                   |
|                        | Antidepresivos (1)                       |
|                        | Otros medicamentos (1)                   |
| Déficit sensorial      | Ninguno (0)                              |
|                        | Alteraciones visuales (1)                |
|                        | Alteraciones auditivas (1)               |
|                        | Alteraciones motoras en extremidades (1) |
| Estado mental          | Orientado (0)                            |
|                        | Confuso (1)                              |
| Deambulaci3n           | Normal (0)                               |
|                        | Segura con ayuda (1)                     |
|                        | Insegura con/sin ayuda (1)               |
|                        | Imposible (1)                            |
| <b>Total de puntos</b> |                                          |

Más de dos puntos en esta escala deben tener la consideraci3n de riesgo.

### Escala de Norton para evaluar el riesgo de úlceras por presión

| Puntos | Condición física | Estado mental | Actividad          | Movilidad    | Incontinencia         |
|--------|------------------|---------------|--------------------|--------------|-----------------------|
| 4      | Buena            | Orientado     | Deambula           | Total        | Control de esfínteres |
| 3      | Regular          | Apático       | Deambula con ayuda | Disminuida   | Ocasional             |
| 2      | Mala             | Confuso       | Cama/sillón        | Muy limitada | Urinaria o fecal      |
| 1      | Muy mala         | Inconsciente  | Encamado           | Inmovilidad  | Urinaria y fecal      |

Riesgo bajo: > 18 puntos

Riesgo moderado: 15-18 puntos

Riesgo alto: 10-14 puntos

Riesgo muy alto: < 10 puntos

## Índice PROFUND

| Característica                                     | Puntuación |
|----------------------------------------------------|------------|
| Edad ≥ 85 años                                     | 3          |
| Rasgos clínicos                                    |            |
| Neoplasia activa                                   | 6          |
| Demencia                                           | 3          |
| Disnea clase III-IV NYHA o 3-4 mMRC                | 3          |
| Delirium en el último ingreso en hospital          | 3          |
| Hemoglobina < 10 g/dL                              | 3          |
| Rasgos sociofamiliares                             |            |
| Índice de Barthel < 60                             | 4          |
| Ausencia de cuidador u otro diferente al cónyuge   | 2          |
| ≥ 4 ingresos hospitalarios en los últimos 12 meses | 3          |
| Puntuación total (0-30 puntos)                     |            |

Riesgo de muerte al año.

Bajo: 0-2 puntos; Moderado: 3-6 puntos; Alto: 7-10 puntos; Muy alto: ≥ 11 puntos

## Índice de Paliar

| Característica                                             | Puntuación |
|------------------------------------------------------------|------------|
| Edad $\geq$ 85 años                                        | 3          |
| Anorexia                                                   | 3,5        |
| Disnea clase IV NYHA o 4 mMRC                              | 3,5        |
| Úlceras por presión                                        | 3          |
| Albúmina $<$ 2,5 g/dL                                      | 4          |
| ECOG-PS $\geq$ 3 (más del 50% del tiempo vigil en la cama) | 4          |
| <b>Total de puntos:</b>                                    |            |

Riesgo de muerte a los 6 meses.

Bajo: 0 puntos; Moderado 3-3,5; Alto: 4-7; Muy alto 7,5-21 puntos
